# Supplementary material for: Effectiveness of some novel heterocyclic compounds as corrosion inhibitors for carbon steel in 1 M HCl using practical and theoretical methods
Source: Royal Society of Chemistry journal article supplement (doi:10.1039/d1ra03083c), 2021-01-01

# Mass spectrum of compound H4

28-Aug-13 15:31:26

310 OK

**Cairo University  
 Micro Analytical Center**

**DI Analysis  
 Shimadzu Qp-2010 Plus**

**Sample Information**  
 Analyzed by : Mai Younis  
 Analyzed : 28/08/2013 03:19:36  
 Sample Name : H7  
 Sample ID :  
 Customer Name : Dr. Hala Refaat - Science - Almansoura  
 Data File : C:\GCMSolution\Data\Project1\H7.QGD  
 Org Data File : C:\GCMSolution\Data\Project1\H7.QGD  
 Method File : C:\GCMSolution\Data\Project1\Mai.qgm  
 Org Method File : C:\GCMSolution\Data\Project1\Mai.qgm  
 Report File :  
 Tuning File : C:\GCMSolution\System\Tune1\\_default1.qgt  
 SEndi Modified by : Mai Younis  
 Modified : 28/08/2013 03:24:56

**Method**  
 Analytical Line 1  
 IonSourceTemp : 250.00 °C  
 [MS Table]  
 -Group 1 - Event 1-  
 Start Time : 0.00min  
 End Time : 10.00min  
 ACQ Mode : Scan  
 Event Time : 0.50sec  
 Scan Speed : 1000  
 Start m/z : 50.00  
 End m/z : 500.00  
 Electron Voltage : 70 eV  
 Ionization Mode : EI

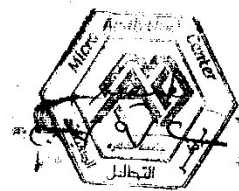

C:\GCMSolution\Data\Project1\H7.QGD

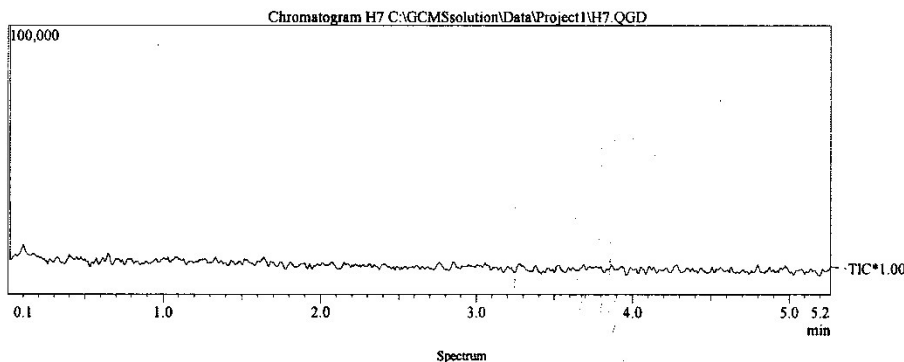

Line#: 1 R. Time: 4.6 (Scan#: 556)  
 MassPeaks: 106  
 RawMode: Single 4.6(556) BasePeak: 64(257)  
 BG Mode: None Group 1 - Event 1

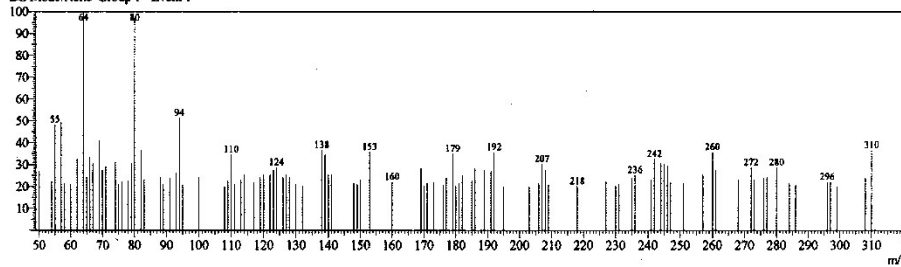

**Mass Table**  
 Line#: 1 R. Time: 4.6 (Scan#: 556)  
 MassPeaks: 106  
 RawMode: Single 4.6(556) BasePeak: 64(257)  
 BG Mode: None Group 1 - Event 1

| # | m/z   | Abs. In | Rel. Int. | # | m/z   | Abs. In | Rel. Int. | # | m/z   | Abs. In | Rel. Int. |
|---|-------|---------|-----------|---|-------|---------|-----------|---|-------|---------|-----------|
| 1 | 50.00 | 70      | 27.24     | 4 | 57.00 | 127     | 49.42     | 7 | 62.00 | 84      | 32.68     |
| 2 | 54.00 | 58      | 22.57     | 5 | 58.00 | 55      | 21.40     | 8 | 64.00 | 257     | 100.00    |
| 3 | 55.00 | 124     | 48.25     | 6 | 60.00 | 54      | 21.01     | 9 | 65.00 | 63      | 24.51     |

28-Aug-13 15:31:26

| #  | m/z    | Abs. In | Rel. Int. | #  | m/z    | Abs. In | Rel. Int. | #   | m/z    | Abs. In | Rel. Int. |
|----|--------|---------|-----------|----|--------|---------|-----------|-----|--------|---------|-----------|
| 10 | 66.00  | 86      | 33.46     | 43 | 127.00 | 65      | 25.29     | 76  | 209.00 | 54      | 21.01     |
| 11 | 67.00  | 79      | 30.74     | 44 | 128.00 | 62      | 24.12     | 77  | 218.00 | 52      | 20.23     |
| 12 | 69.00  | 106     | 41.25     | 45 | 130.00 | 54      | 21.01     | 78  | 227.00 | 58      | 22.57     |
| 13 | 70.00  | 71      | 27.63     | 46 | 132.00 | 52      | 20.23     | 79  | 230.00 | 52      | 20.23     |
| 14 | 71.00  | 76      | 29.57     | 47 | 138.00 | 94      | 36.58     | 80  | 231.00 | 54      | 21.01     |
| 15 | 74.00  | 81      | 31.52     | 48 | 139.00 | 89      | 34.63     | 81  | 235.00 | 62      | 24.12     |
| 16 | 75.00  | 54      | 21.01     | 49 | 140.00 | 65      | 25.29     | 82  | 236.00 | 65      | 25.29     |
| 17 | 76.00  | 57      | 22.18     | 50 | 141.00 | 65      | 25.29     | 83  | 241.00 | 60      | 23.35     |
| 18 | 78.00  | 58      | 22.57     | 51 | 148.00 | 55      | 21.40     | 84  | 242.00 | 84      | 32.68     |
| 19 | 79.00  | 79      | 30.74     | 52 | 149.00 | 54      | 21.01     | 85  | 244.00 | 79      | 30.74     |
| 20 | 80.00  | 249     | 96.89     | 53 | 150.00 | 60      | 23.35     | 86  | 245.00 | 78      | 30.35     |
| 21 | 82.00  | 94      | 36.58     | 54 | 153.00 | 92      | 35.80     | 87  | 246.00 | 76      | 29.57     |
| 22 | 83.00  | 60      | 23.35     | 55 | 160.00 | 57      | 22.18     | 88  | 247.00 | 57      | 22.18     |
| 23 | 88.00  | 62      | 24.12     | 56 | 169.00 | 73      | 28.40     | 89  | 251.00 | 55      | 21.40     |
| 24 | 89.00  | 54      | 21.01     | 57 | 170.00 | 52      | 20.23     | 90  | 257.00 | 66      | 25.68     |
| 25 | 91.00  | 62      | 24.12     | 58 | 171.00 | 55      | 21.40     | 91  | 260.00 | 92      | 35.80     |
| 26 | 93.00  | 68      | 26.46     | 59 | 173.00 | 57      | 22.18     | 92  | 261.00 | 71      | 27.63     |
| 27 | 94.00  | 132     | 51.36     | 60 | 176.00 | 54      | 21.01     | 93  | 268.00 | 60      | 23.35     |
| 28 | 95.00  | 54      | 21.01     | 61 | 177.00 | 62      | 24.12     | 94  | 272.00 | 74      | 28.79     |
| 29 | 100.00 | 63      | 24.51     | 62 | 179.00 | 90      | 35.02     | 95  | 273.00 | 60      | 23.35     |
| 30 | 108.00 | 52      | 20.23     | 63 | 180.00 | 52      | 20.23     | 96  | 276.00 | 62      | 24.12     |
| 31 | 109.00 | 58      | 22.57     | 64 | 181.00 | 55      | 21.40     | 97  | 277.00 | 63      | 24.51     |
| 32 | 110.00 | 89      | 34.63     | 65 | 182.00 | 65      | 25.29     | 98  | 280.00 | 74      | 28.79     |
| 33 | 111.00 | 54      | 21.01     | 66 | 185.00 | 58      | 22.57     | 99  | 284.00 | 55      | 21.40     |
| 34 | 113.00 | 60      | 23.35     | 67 | 186.00 | 73      | 28.40     | 100 | 286.00 | 54      | 21.01     |
| 35 | 114.00 | 66      | 25.68     | 68 | 189.00 | 71      | 27.63     | 101 | 296.00 | 57      | 22.18     |
| 36 | 117.00 | 57      | 22.18     | 69 | 191.00 | 70      | 27.24     | 102 | 297.00 | 57      | 22.18     |
| 37 | 119.00 | 63      | 24.51     | 70 | 192.00 | 92      | 35.80     | 103 | 299.00 | 52      | 20.23     |
| 38 | 120.00 | 65      | 25.29     | 71 | 195.00 | 52      | 20.23     | 104 | 308.00 | 63      | 24.51     |
| 39 | 122.00 | 65      | 25.29     | 72 | 203.00 | 52      | 20.23     | 105 | 310.00 | 94      | 36.58     |
| 40 | 123.00 | 71      | 27.63     | 73 | 206.00 | 55      | 21.40     |     |        |         |           |
| 41 | 124.00 | 74      | 28.79     | 74 | 207.00 | 78      | 30.35     |     |        |         |           |
| 42 | 126.00 | 62      | 24.12     | 75 | 208.00 | 71      | 27.63     |     |        |         |           |

# 1H-NMR spectrum of compound H4

NadaAbdelaleem-H4-DMSO-H  
Pulse Sequence: s2pu1  
Solvent: DMSO  
Temp. 30.0 C / 303.1 K  
Mercury-3000B "NMR300"  
  
Relax. delay 1.000 sec  
Pulse 10.6 degrees  
Acq. time 4.004 sec  
Width 8000.0 Hz  
13 repetitions  
OBSERVE H1, 500.0687710 MHz  
DATA PROCESSING  
F1 size 65530  
Total time 19 min, 19 sec

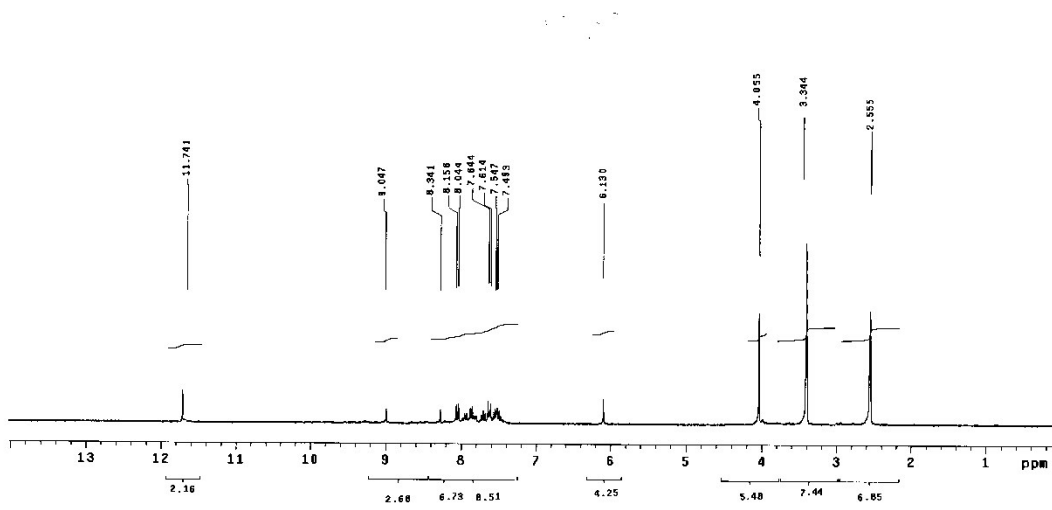

# 13C-NMR spectrum of compound H4

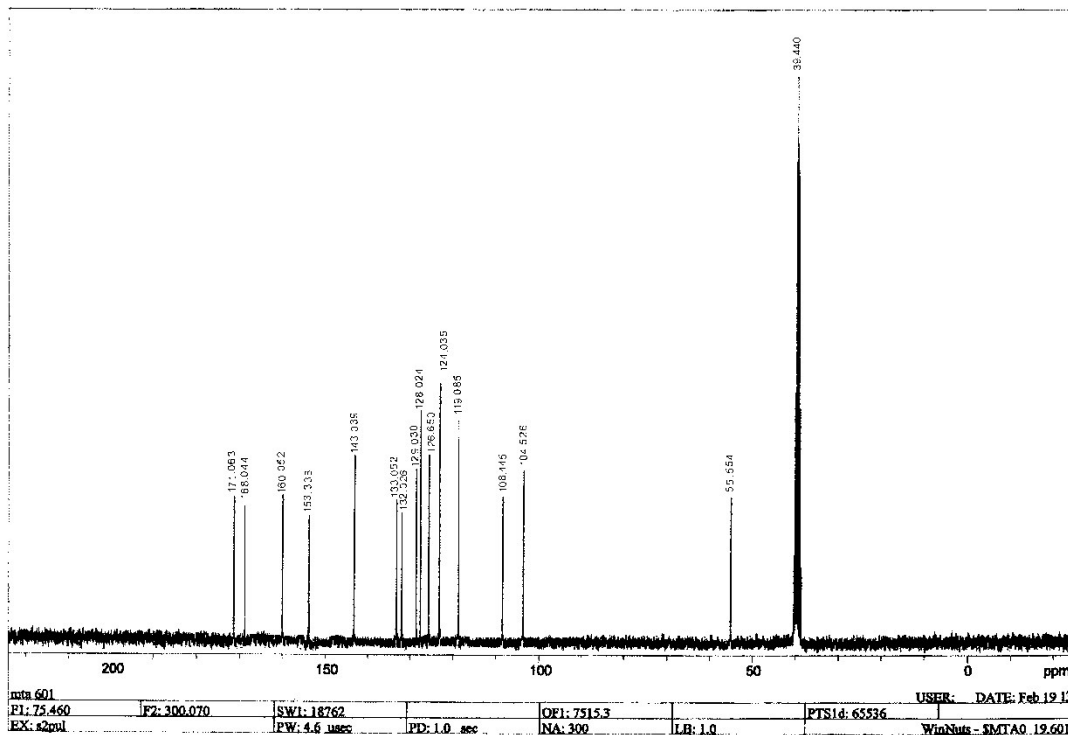

# Mass spectrum of compound H5

28-Aug-13 15:42:25

**Cairo University  
Micro Analytical Center**

336 *SV*

**DI Analysis  
Shimadzu Qp-2010 Plus**

Sample Information  
 Analyzed by : Mai Younis  
 Analyzed : 28/08/2013 03:33:28  
 Sample Name : H8  
 Sample ID :  
 Customer Name : Dr.Hala Refaat - Science - Almansoura  
 Data File : C:\GCMSsolution\Data\Project1\H8.QGD  
 Org Data File : C:\GCMSsolution\Data\Project1\H8.QGD  
 Method File : C:\GCMSsolution\Data\Project1\Mai.qgm  
 Org Method File : C:\GCMSsolution\Data\Project1\Mai.qgm  
 Report File :  
 Tuning File : C:\GCMSsolution\System1\Tune1\_default1.qgt  
 \$EndIS Modified by : Mai Younis  
 Modified : 28/08/2013 03:41:28

Method  
 Analytical Line 1  
 IonSourceTemp : 250.00 °C  
 [MS Table]  
 -Group 1 - Event 1-  
 Start Time : 0.00min  
 End Time : 10.00min  
 ACQ Mode : Scan  
 Event Time : 0.50sec  
 Scan Speed : 833  
 Start m/z : 50.00  
 End m/z : 450.00  
 Electron Voltage : 70 eV  
 Ionization Mode : EI

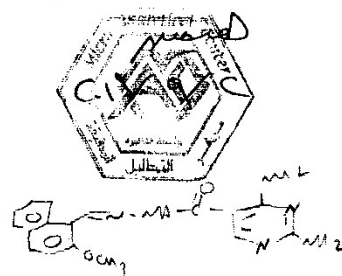

C:\GCMSsolution\Data\Project1\H8.QGD

Chromatogram H8 C:\GCMSsolution\Data\Project1\H8.QGD

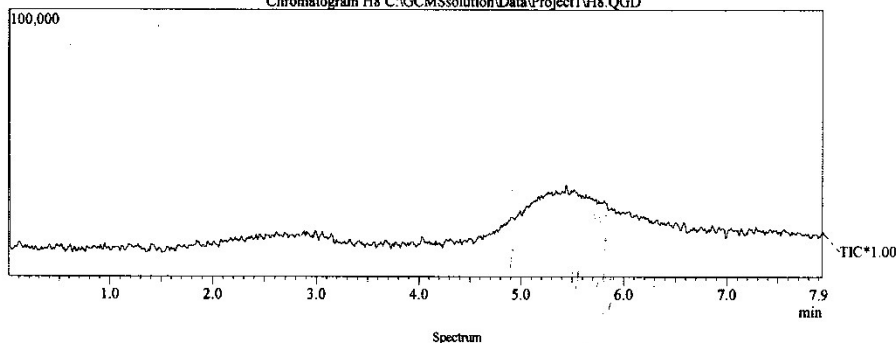

Line#: 1 R.Time: 7.0(Scan#: 846)  
 MassPeaks: 166  
 RawMode: Single 7.0(846) BasePeak: 137(762)  
 BG Mode: None Group 1 - Event 1

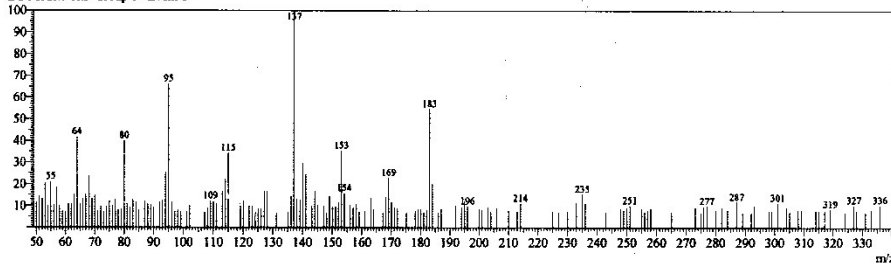

Mass Table  
 Line#: 1 R.Time: 7.0(Scan#: 846)  
 MassPeaks: 166  
 RawMode: Single 7.0(846) BasePeak: 137(762)  
 BG Mode: None Group 1 - Event 1

| # | m/z   | Abs. In | Rel. Int. | # | m/z   | Abs. In | Rel. Int. | # | m/z   | Abs. In | Rel. Int. |
|---|-------|---------|-----------|---|-------|---------|-----------|---|-------|---------|-----------|
| 1 | 50.00 | 89      | 11.68     | 4 | 53.00 | 156     | 20.47     | 7 | 56.00 | 81      | 10.63     |
| 2 | 51.00 | 110     | 14.44     | 5 | 54.00 | 76      | 9.97      | 8 | 57.00 | 143     | 18.77     |
| 3 | 52.00 | 102     | 13.39     | 6 | 55.00 | 162     | 21.26     | 9 | 58.00 | 79      | 10.37     |

| #  | m/z    | Abs. In | Rel. Int. | #   | m/z    | Abs. In | Rel. Int. | #   | m/z    | Abs. In | Rel. Int. |
|----|--------|---------|-----------|-----|--------|---------|-----------|-----|--------|---------|-----------|
| 10 | 59.00  | 57      | 7.48      | 63  | 124.10 | 55      | 7.22      | 116 | 203.00 | 73      | 9.58      |
| 11 | 60.00  | 55      | 7.22      | 64  | 125.10 | 68      | 8.92      | 117 | 204.00 | 57      | 7.48      |
| 12 | 61.00  | 84      | 11.02     | 65  | 126.10 | 65      | 8.53      | 118 | 206.00 | 68      | 8.92      |
| 13 | 62.00  | 82      | 10.76     | 66  | 127.10 | 129     | 16.93     | 119 | 210.00 | 62      | 8.14      |
| 14 | 63.00  | 118     | 15.49     | 67  | 128.10 | 129     | 16.93     | 120 | 213.00 | 57      | 7.48      |
| 15 | 64.00  | 319     | 41.86     | 68  | 131.10 | 52      | 6.82      | 121 | 214.00 | 86      | 11.29     |
| 16 | 65.00  | 84      | 11.02     | 69  | 135.10 | 55      | 7.22      | 122 | 225.00 | 57      | 7.48      |
| 17 | 66.00  | 103     | 13.52     | 70  | 136.10 | 110     | 14.44     | 123 | 227.00 | 54      | 7.09      |
| 18 | 67.00  | 118     | 15.49     | 71  | 137.05 | 762     | 100.00    | 124 | 230.00 | 57      | 7.48      |
| 19 | 68.00  | 182     | 23.88     | 72  | 138.10 | 100     | 13.12     | 125 | 233.00 | 90      | 11.81     |
| 20 | 69.00  | 103     | 13.52     | 73  | 139.10 | 97      | 12.73     | 126 | 235.00 | 118     | 15.49     |
| 21 | 70.00  | 113     | 14.83     | 74  | 140.10 | 226     | 29.66     | 127 | 236.00 | 86      | 11.29     |
| 22 | 71.00  | 60      | 7.87      | 75  | 141.10 | 190     | 24.93     | 128 | 243.00 | 54      | 7.09      |
| 23 | 72.00  | 74      | 9.71      | 76  | 143.10 | 76      | 9.97      | 129 | 248.00 | 68      | 8.92      |
| 24 | 73.00  | 54      | 7.09      | 77  | 144.10 | 127     | 16.67     | 130 | 249.00 | 62      | 8.14      |
| 25 | 74.00  | 73      | 9.58      | 78  | 145.10 | 79      | 10.37     | 131 | 250.00 | 71      | 9.32      |
| 26 | 75.00  | 94      | 12.34     | 79  | 147.10 | 74      | 9.71      | 132 | 251.00 | 78      | 10.24     |
| 27 | 76.00  | 78      | 10.24     | 80  | 148.10 | 52      | 6.82      | 133 | 255.00 | 68      | 8.92      |
| 28 | 77.00  | 98      | 12.86     | 81  | 149.10 | 111     | 14.57     | 134 | 256.00 | 55      | 7.22      |
| 29 | 78.00  | 63      | 8.27      | 82  | 150.10 | 71      | 9.32      | 135 | 257.00 | 60      | 7.87      |
| 30 | 79.00  | 68      | 8.92      | 83  | 151.10 | 74      | 9.71      | 136 | 258.00 | 66      | 8.66      |
| 31 | 80.00  | 305     | 40.03     | 84  | 152.10 | 89      | 11.68     | 137 | 265.00 | 54      | 7.09      |
| 32 | 81.00  | 84      | 11.02     | 85  | 153.10 | 270     | 35.43     | 138 | 273.00 | 70      | 9.19      |
| 33 | 82.00  | 70      | 9.19      | 86  | 154.10 | 121     | 15.88     | 139 | 275.00 | 54      | 7.09      |
| 34 | 83.00  | 98      | 12.86     | 87  | 156.10 | 79      | 10.37     | 140 | 276.00 | 73      | 9.58      |
| 35 | 84.00  | 89      | 11.68     | 88  | 157.10 | 70      | 9.19      | 141 | 277.00 | 76      | 9.97      |
| 36 | 85.00  | 63      | 8.27      | 89  | 158.10 | 84      | 11.02     | 142 | 280.00 | 62      | 8.14      |
| 37 | 87.00  | 92      | 12.07     | 90  | 159.10 | 55      | 7.22      | 143 | 282.00 | 70      | 9.19      |
| 38 | 88.00  | 81      | 10.63     | 91  | 161.10 | 58      | 7.61      | 144 | 284.00 | 63      | 8.27      |
| 39 | 89.00  | 81      | 10.63     | 92  | 163.10 | 106     | 13.91     | 145 | 287.00 | 90      | 11.81     |
| 40 | 90.00  | 71      | 9.32      | 93  | 164.10 | 65      | 8.53      | 146 | 289.00 | 52      | 6.82      |
| 41 | 92.00  | 90      | 11.81     | 94  | 167.10 | 52      | 6.82      | 147 | 292.00 | 52      | 6.82      |
| 42 | 93.00  | 97      | 12.73     | 95  | 168.10 | 108     | 14.17     | 148 | 293.00 | 76      | 9.97      |
| 43 | 94.00  | 193     | 25.33     | 96  | 169.10 | 175     | 22.97     | 149 | 298.00 | 57      | 7.48      |
| 44 | 95.05  | 505     | 66.27     | 97  | 170.10 | 89      | 11.68     | 150 | 299.00 | 57      | 7.48      |
| 45 | 96.10  | 90      | 11.81     | 98  | 171.10 | 71      | 9.32      | 151 | 301.00 | 87      | 11.42     |
| 46 | 97.10  | 57      | 7.48      | 99  | 172.10 | 70      | 9.19      | 152 | 304.00 | 71      | 9.32      |
| 47 | 98.10  | 63      | 8.27      | 100 | 175.10 | 52      | 6.82      | 153 | 305.00 | 57      | 7.48      |
| 48 | 99.10  | 55      | 7.22      | 101 | 178.10 | 62      | 8.14      | 154 | 308.00 | 63      | 8.27      |
| 49 | 101.10 | 55      | 7.22      | 102 | 179.10 | 66      | 8.66      | 155 | 309.00 | 63      | 8.27      |
| 50 | 102.10 | 78      | 10.24     | 103 | 180.10 | 65      | 8.53      | 156 | 314.00 | 62      | 8.14      |
| 51 | 107.10 | 55      | 7.22      | 104 | 181.10 | 54      | 7.09      | 157 | 315.00 | 57      | 7.48      |
| 52 | 108.10 | 70      | 9.19      | 105 | 182.10 | 62      | 8.14      | 158 | 317.00 | 60      | 7.87      |
| 53 | 109.10 | 94      | 12.34     | 106 | 183.05 | 417     | 54.72     | 159 | 319.00 | 65      | 8.53      |
| 54 | 110.10 | 90      | 11.81     | 107 | 184.00 | 153     | 20.08     | 160 | 324.00 | 54      | 7.09      |
| 55 | 111.10 | 82      | 10.76     | 108 | 186.00 | 52      | 6.82      | 161 | 327.00 | 79      | 10.37     |
| 56 | 113.10 | 126     | 16.54     | 109 | 187.00 | 65      | 8.53      | 162 | 328.00 | 62      | 8.14      |
| 57 | 114.10 | 170     | 22.31     | 110 | 192.00 | 78      | 10.24     | 163 | 331.00 | 54      | 7.09      |
| 58 | 115.10 | 262     | 34.38     | 111 | 194.00 | 71      | 9.32      | 164 | 333.00 | 63      | 8.27      |
| 59 | 119.10 | 89      | 11.68     | 112 | 195.00 | 92      | 12.07     | 165 | 336.00 | 79      | 10.37     |
| 60 | 120.10 | 94      | 12.34     | 113 | 196.00 | 76      | 9.97      |     |        |         |           |
| 61 | 122.10 | 78      | 10.24     | 114 | 200.00 | 65      | 8.53      |     |        |         |           |
| 62 | 123.10 | 73      | 9.58      | 115 | 201.00 | 62      | 8.14      |     |        |         |           |

# 1H-NMR spectrum of compound H5

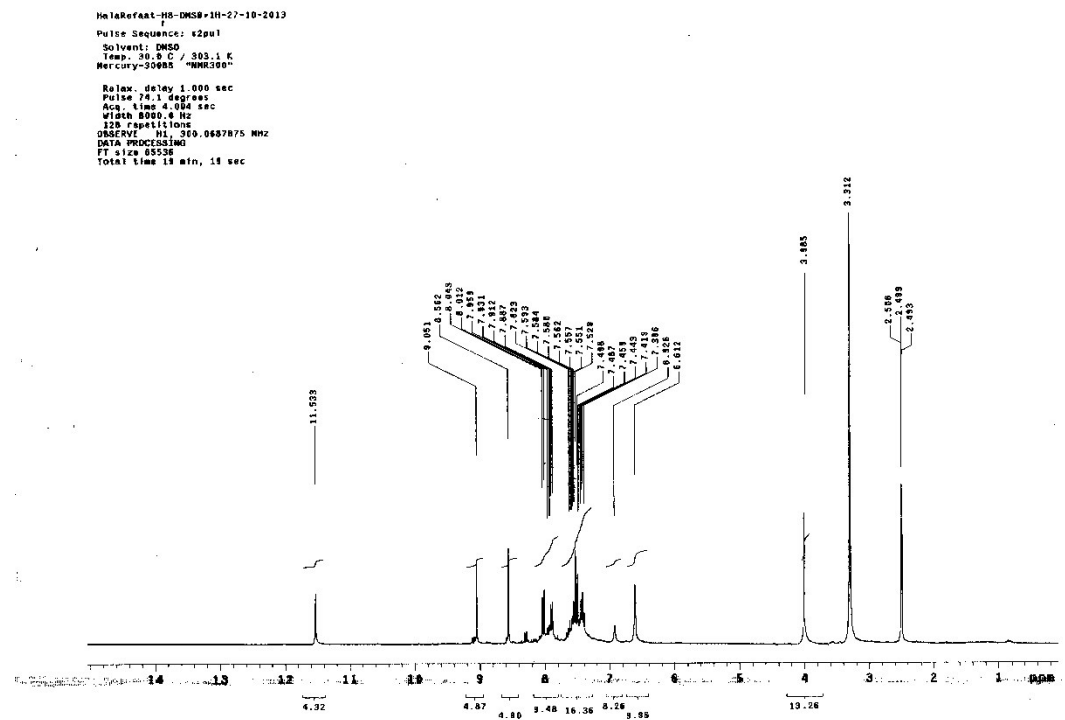

# IR spectrum of compound H5

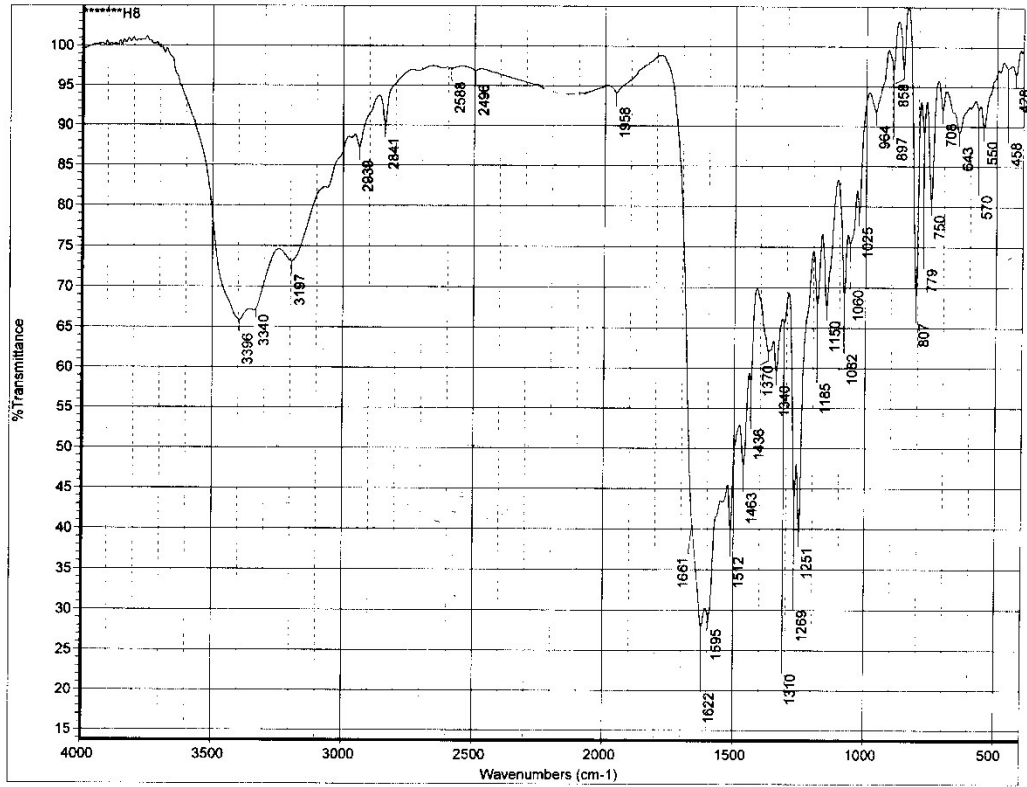



# 13C-NMR spectrum of compound H5

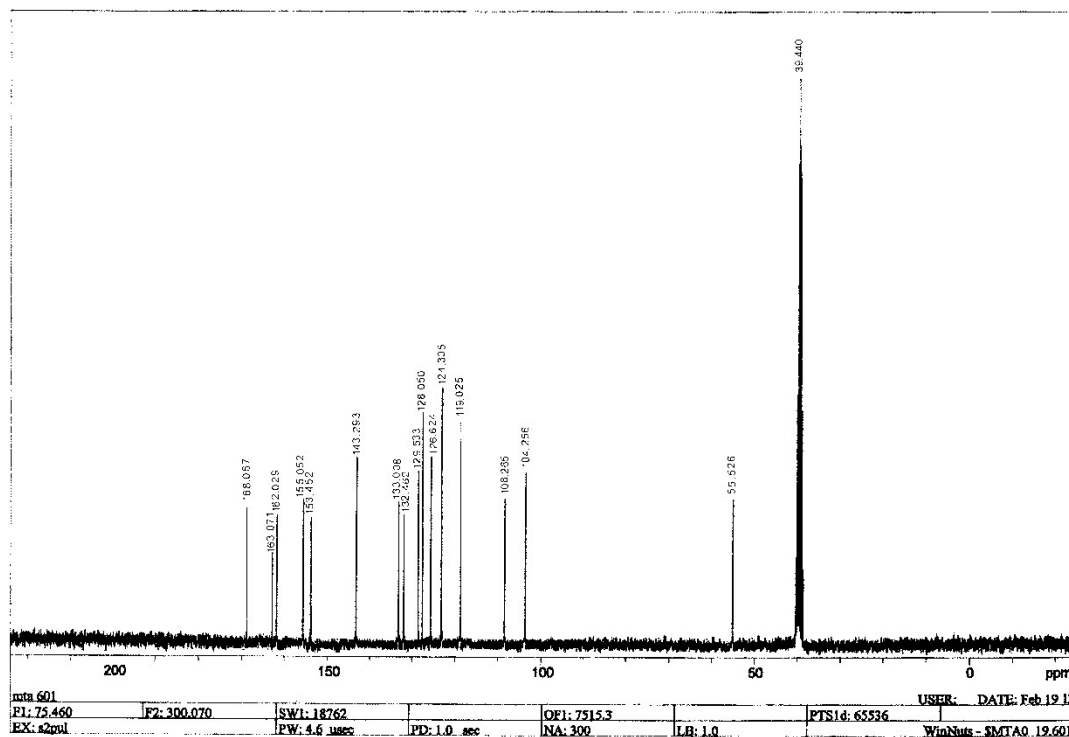

# Mass spectrum of compound H6

28-Aug-13 14:19:05

## Cairo University Micro Analytical Center

DI Analysis  
Shimadzu Qp-2010 Plus

Sample Information  
 Analyzed by : Mai Younis  
 Analyzed : 28/08/2013 02:07:58  
 Sample Name : H1  
 Sample ID :  
 Customer Name : Dr Hala Refaat - Science - Almansoura  
 Data File : C:\GCMSsolution\Data\Project\H1.QGD  
 Org Data File : C:\GCMSsolution\Data\Project\H1.QGD  
 Method File : C:\GCMSsolution\Data\Project\H1.Mai.qgm  
 Org Method File : C:\GCMSsolution\Data\Project\H1.Mai.qgm  
 Report File :  
 Tuning File : C:\GCMSsolution\System1\Tune1\\_default1.tgt  
 \$Endf\$ Modified by : Mai Younis  
 Modified : 28/08/2013 02:14:27

Method  
 Analytical Line 1  
 IonSourceTemp : 250.00 °C  
 [MS Table]  
 --Group 1 - Event 1--  
 Start Time : 0.00min  
 End Time : 10.00min  
 ACQ Mode : Scan  
 Event Time : 0.50sec  
 Scan Speed : 1000  
 Start m/z : 50.00  
 End m/z : 500.00  
 Electron Voltage : 70 eV  
 Ionization Mode : EI

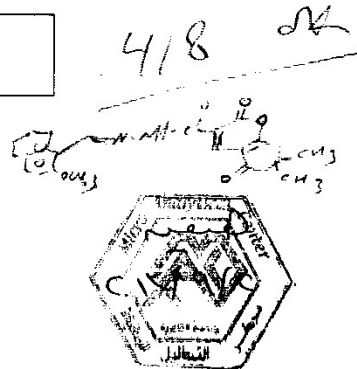

C:\GCMSsolution\Data\Project\H1.QGD

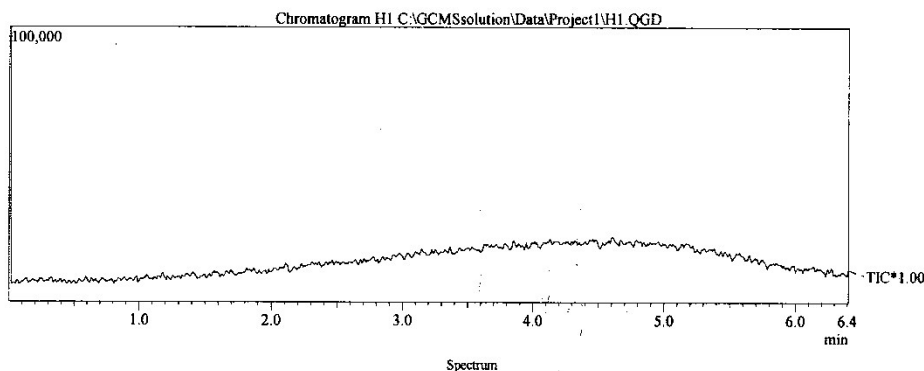

Line#: 1 R.Time: 4.3(Scan#: 517)  
 MassPeaks: 128  
 RawMode: Single 4.3(517) BasePeak: 64(396)  
 BG Mode: Averaged 3.7-3.7(445-445) Group 1 - Event 1

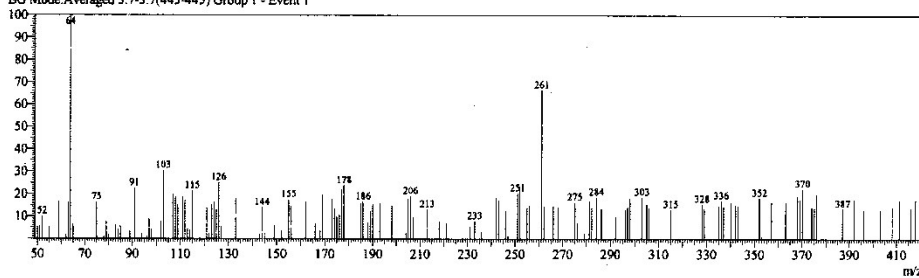

Mass Table  
 Line#: 1 R.Time: 4.3(Scan#: 517)  
 MassPeaks: 128  
 RawMode: Single 4.3(517) BasePeak: 64(396)  
 BG Mode: Averaged 3.7-3.7(445-445) Group 1 - Event 1

| # | m/z   | Abs. In | Rel. Int. | # | m/z   | Abs. In | Rel. Int. | # | m/z   | Abs. In | Rel. Int. |
|---|-------|---------|-----------|---|-------|---------|-----------|---|-------|---------|-----------|
| 1 | 50.00 | 21      | 5.30      | 4 | 55.00 | 22      | 5.56      | 7 | 63.00 | 64      | 16.16     |
| 2 | 51.00 | 24      | 6.06      | 5 | 59.00 | 66      | 16.67     | 8 | 63.95 | 396     | 100.00    |
| 3 | 52.00 | 40      | 10.10     | 6 | 62.00 | 7       | 1.77      | 9 | 65.00 | 26      | 6.57      |

| #  | m/z    | Abs. In | Rel. Int. | #  | m/z    | Abs. In | Rel. Int. | #   | m/z    | Abs. In | Rel. Int. |
|----|--------|---------|-----------|----|--------|---------|-----------|-----|--------|---------|-----------|
| 10 | 75.00  | 65      | 16.41     | 50 | 168.00 | 14      | 3.54      | 90  | 281.10 | 68      | 17.17     |
| 11 | 78.00  | 4       | 1.01      | 51 | 169.00 | 78      | 19.70     | 91  | 282.10 | 55      | 13.89     |
| 12 | 79.00  | 30      | 7.58      | 52 | 173.00 | 71      | 17.93     | 92  | 284.10 | 74      | 18.69     |
| 13 | 79.95  | 7       | 1.77      | 53 | 174.00 | 54      | 13.64     | 93  | 286.10 | 54      | 13.64     |
| 14 | 83.00  | 24      | 6.06      | 54 | 175.00 | 39      | 9.85      | 94  | 292.10 | 40      | 10.10     |
| 15 | 84.00  | 18      | 4.55      | 55 | 176.00 | 43      | 10.86     | 95  | 296.10 | 52      | 13.13     |
| 16 | 85.00  | 23      | 5.81      | 56 | 177.00 | 87      | 21.97     | 96  | 297.10 | 57      | 14.39     |
| 17 | 89.00  | 14      | 3.54      | 57 | 178.00 | 95      | 23.99     | 97  | 298.10 | 73      | 18.43     |
| 18 | 91.00  | 90      | 22.73     | 58 | 185.00 | 62      | 15.66     | 98  | 303.10 | 74      | 18.69     |
| 19 | 94.00  | 8       | 2.02      | 59 | 186.00 | 66      | 16.67     | 99  | 305.10 | 62      | 15.66     |
| 20 | 96.00  | 5       | 1.26      | 60 | 188.00 | 29      | 7.32      | 100 | 306.10 | 55      | 13.89     |
| 21 | 97.00  | 35      | 8.84      | 61 | 189.00 | 48      | 12.12     | 101 | 315.10 | 52      | 13.13     |
| 22 | 98.00  | 16      | 4.04      | 62 | 190.00 | 62      | 15.66     | 102 | 328.10 | 62      | 15.66     |
| 23 | 102.00 | 31      | 7.83      | 63 | 193.00 | 62      | 15.66     | 103 | 329.10 | 55      | 13.89     |
| 24 | 103.00 | 121     | 30.56     | 64 | 198.00 | 58      | 14.65     | 104 | 335.10 | 58      | 14.65     |
| 25 | 107.00 | 79      | 19.95     | 65 | 204.00 | 11      | 2.78      | 105 | 336.10 | 68      | 17.17     |
| 26 | 108.00 | 74      | 18.69     | 66 | 205.00 | 71      | 17.93     | 106 | 337.10 | 57      | 14.39     |
| 27 | 109.00 | 60      | 15.15     | 67 | 206.00 | 76      | 19.19     | 107 | 340.10 | 65      | 16.41     |
| 28 | 111.00 | 74      | 18.69     | 68 | 207.00 | 38      | 9.60      | 108 | 342.10 | 60      | 15.15     |
| 29 | 112.00 | 68      | 17.17     | 69 | 213.00 | 52      | 13.13     | 109 | 343.10 | 58      | 14.65     |
| 30 | 113.00 | 18      | 4.55      | 70 | 218.00 | 32      | 8.08      | 110 | 352.10 | 73      | 18.43     |
| 31 | 114.00 | 16      | 4.04      | 71 | 221.00 | 28      | 7.07      | 111 | 353.10 | 6       | 1.52      |
| 32 | 115.00 | 85      | 21.46     | 72 | 231.00 | 21      | 5.30      | 112 | 357.10 | 65      | 16.41     |
| 33 | 121.00 | 55      | 13.89     | 73 | 233.00 | 32      | 8.08      | 113 | 363.10 | 65      | 16.41     |
| 34 | 122.00 | 10      | 2.53      | 74 | 236.00 | 13      | 3.28      | 114 | 368.10 | 77      | 19.44     |
| 35 | 123.00 | 60      | 15.15     | 75 | 242.00 | 73      | 18.43     | 115 | 369.10 | 70      | 17.68     |
| 36 | 124.00 | 65      | 16.41     | 76 | 243.00 | 68      | 17.17     | 116 | 370.10 | 89      | 22.47     |
| 37 | 125.00 | 52      | 13.13     | 77 | 246.00 | 50      | 12.63     | 117 | 374.10 | 57      | 14.39     |
| 38 | 126.00 | 100     | 25.25     | 78 | 247.00 | 5       | 1.26      | 118 | 375.10 | 55      | 13.89     |
| 39 | 127.00 | 21      | 5.30      | 79 | 251.00 | 81      | 20.45     | 119 | 376.10 | 79      | 19.95     |
| 40 | 133.00 | 73      | 18.43     | 80 | 252.00 | 92      | 23.23     | 120 | 387.10 | 54      | 13.64     |
| 41 | 143.00 | 8       | 2.02      | 81 | 255.00 | 55      | 13.89     | 121 | 392.10 | 71      | 17.93     |
| 42 | 144.00 | 56      | 14.14     | 82 | 256.00 | 58      | 14.65     | 122 | 396.10 | 52      | 13.13     |
| 43 | 145.00 | 10      | 2.53      | 83 | 261.10 | 264     | 66.67     | 123 | 403.10 | 52      | 13.13     |
| 44 | 149.00 | 25      | 6.31      | 84 | 262.10 | 59      | 14.90     | 124 | 408.10 | 57      | 14.39     |
| 45 | 152.00 | 14      | 3.54      | 85 | 266.10 | 58      | 14.65     | 125 | 411.10 | 70      | 17.68     |
| 46 | 155.00 | 70      | 17.68     | 86 | 268.10 | 57      | 14.39     | 126 | 416.10 | 55      | 13.89     |
| 47 | 156.00 | 58      | 14.65     | 87 | 275.10 | 65      | 16.41     | 127 | 418.10 | 71      | 17.93     |
| 48 | 162.00 | 65      | 16.41     | 88 | 276.10 | 29      | 7.32      |     |        |         |           |
| 49 | 166.00 | 27      | 6.82      | 89 | 279.10 | 10      | 2.53      |     |        |         |           |

# 1H-NMR spectrum of compound H6

MalReAct-11-DMSO-1H-27-10-2013  
Pulse Sequence: s2pu1  
Solvent: DMSO  
Temp: 30.8 C / 283.1 K  
Mercury-300DB "MRF300"  
Relax. delay 1.000 sec  
Pulse 70.0 degree  
Acq. time 4.804 sec  
Width 6000.0 Hz  
128 repetitions  
OBSERVE: H1 300.0567875 MHz  
DATA PROCESSING  
F1 size 65536  
Total time 19 min, 14 sec

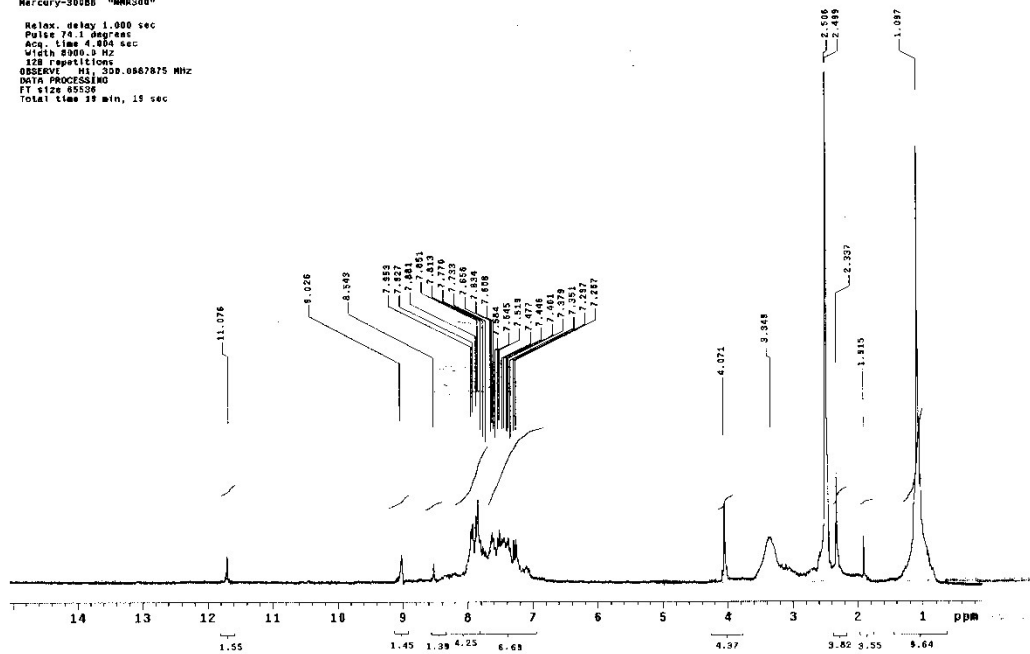

# IR spectrum of compound H6

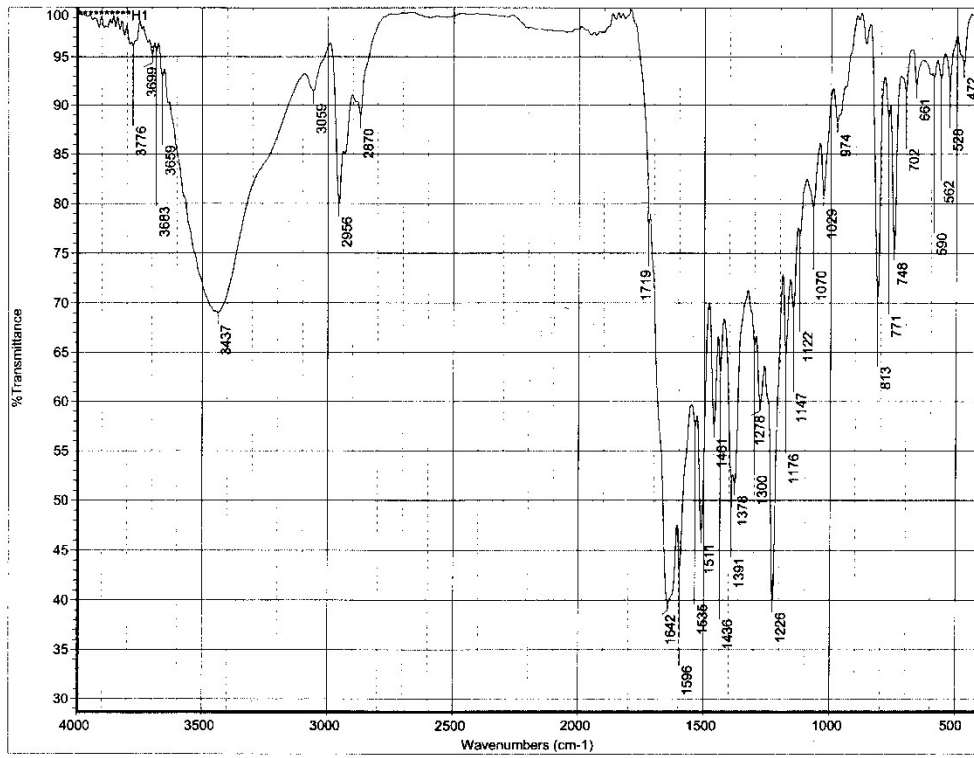

# 13C-NMR spectrum of compound H6

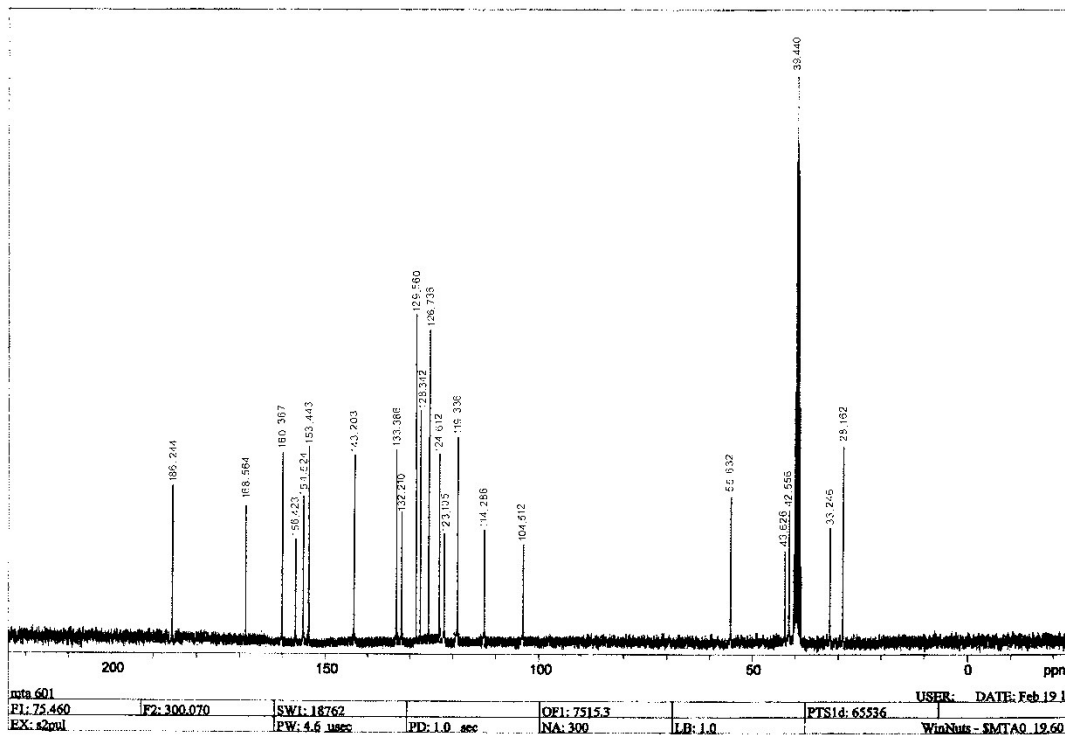

Supplement: d1ra03083c1.pdf [file d1ra03083c1.pdf]
